# Supplementary material
Source: PubMed Central journal article supplement (PMC5683029)
Supplement: f-73-00601-sup1.pdf [file f-73-00601-sup1.pdf]

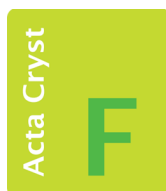

STRUCTURAL BIOLOGY  
COMMUNICATIONS

**Volume 73 (2017)**

**Supporting information for article:**

*Periplasmic form of dipeptidyl aminopeptidase IV from *Pseudoxanthomonas mexicana* WO24: purification, kinetic characterization, crystallization and X-ray crystallographic analysis*

**Saori Roppongi, Chika Tateoka, Mayu Fujimoto, Ippei Iizuka, Saori Morisawa, Akihiro Nakamura, Nobuyuki Honma, Yoshiyuki Suzuki, Yosuke Shida, Wataru Ogasawara, Nobutada Tanaka, Yasumitsu Sakamoto and Takamasa Nonaka**

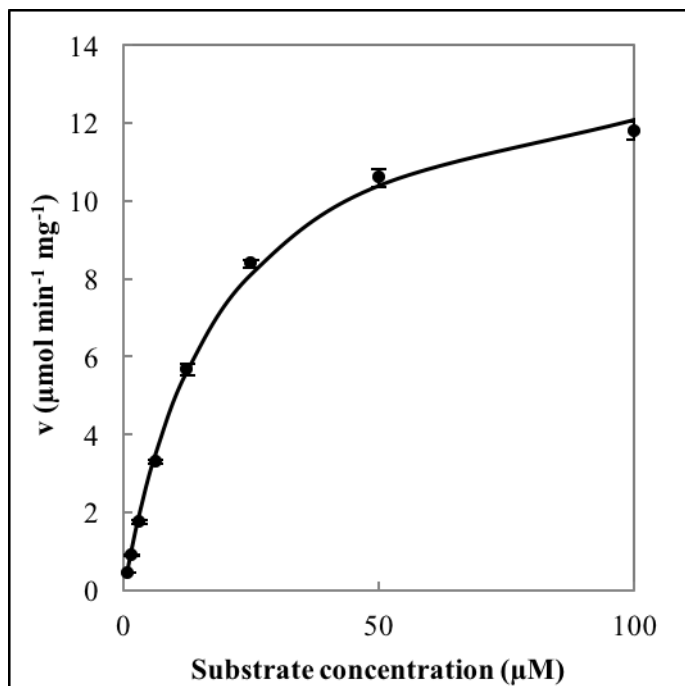

**Figure S1** Reaction rate of PmDAP IV for Gly-Pro-MCA digestion as a function of the substrate concentration. Dots are experimental value and a solid line is regression curve based on the Michaelis–Menten equation. Error bars were calculated from three independent experiments.
